# Supplementary material
Source: Springer Nature journal article supplement (https://www.springermedizin.de/resource/supplementary/12889_2009_2019_MOESM6_ESM.pdf/9484318)

Your risk of having a heart attack  
or stroke within the next 5 years

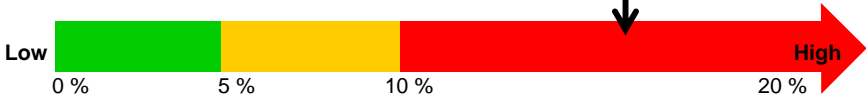

Supplement: MOESM6 [file 9484318]
